# Supplementary material
Source: PubMed Central journal article supplement (PMC6384101)
Supplement: AEM.02154-18-s0001.pdf [file AEM.02154-18-s0001.pdf]

## **Supporting Information**

### **Biodegradation of the Allelopathic Chemical, Pterostilbene, by *Sphingobium* sp. from Peanut Rhizosphere**

Ri-Qing Yu, Zohre Kurt, Fei He, Jim C. Spain

**Supplemental figures: Figure S1 – S6**

**Supplemental tables: Table S1 –S2**

**Materials and Methods –Extra LCMS methods for sample analysis**

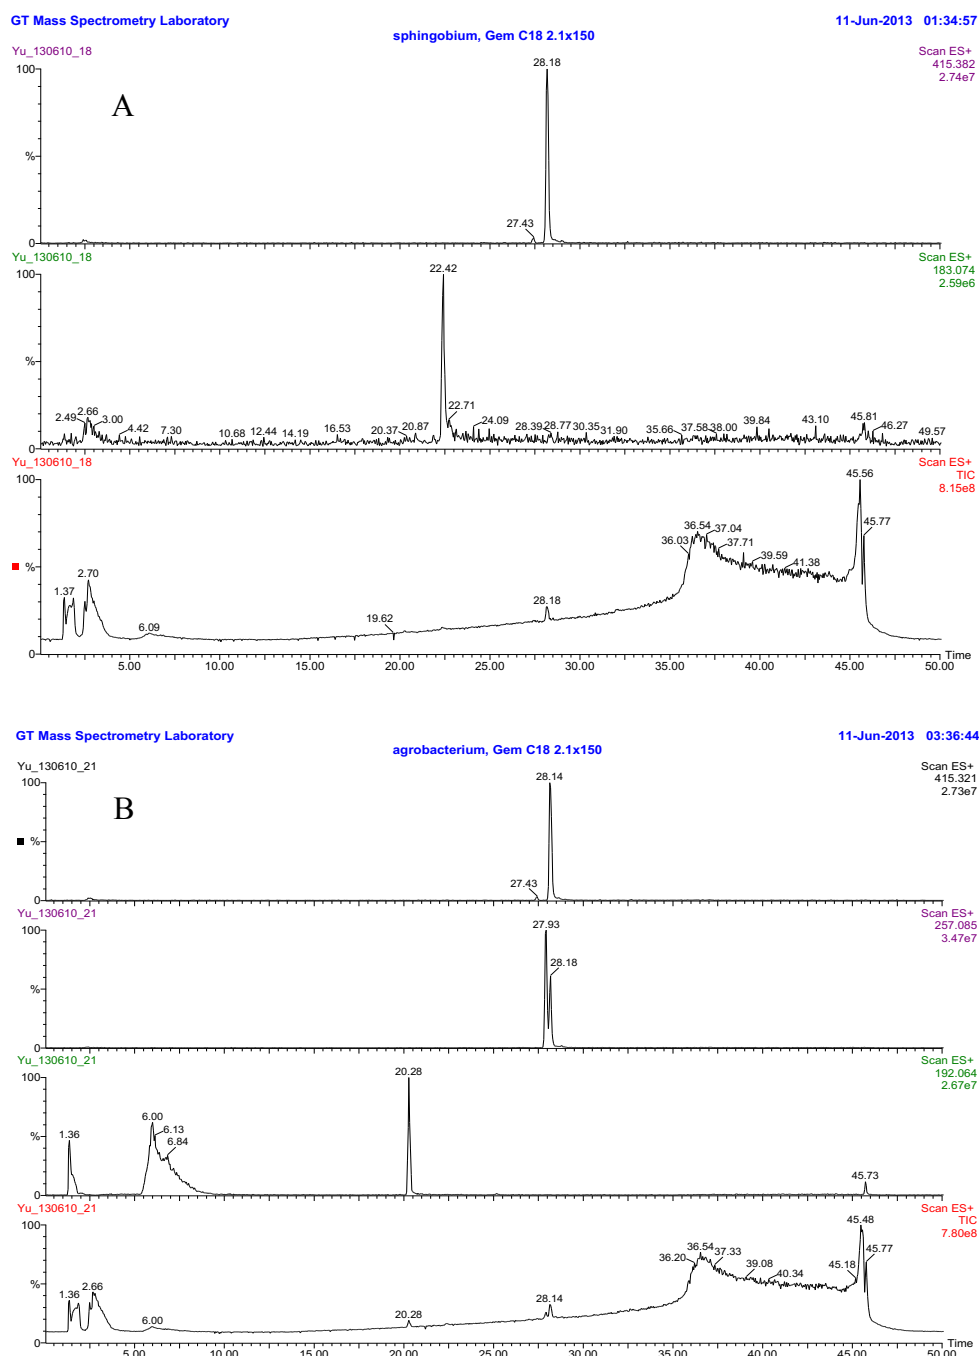

**Figure S1.** LC-MS analyses of novel products from pterostilbene metabolism by *Sphingobium* sp. JS1018 (**panel A**) at HPLC RT 6.23 min (or RT 28.18 min on LC-MS with an  $m/z$  value of 415); and novel products from pterostilbene metabolism by *Agrobacterium tumefaciens* JS1013 (**panel B**) at HPLC RT 6.23 min (or RT 28.14 min on LC-MS with an  $m/z$  value of 415) and RT

5.57 min (or RT 20.28 on LC-MS with an m/z value of 192) with pterostilbene as a reference (m/z of 257).

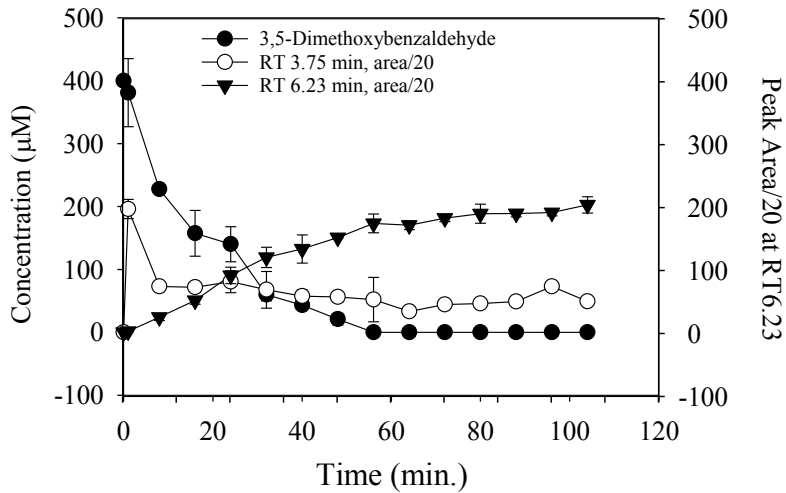

**Figure S2.** Dimethoxybenzaldehyde metabolism kinetics and novel metabolites produced during enzyme assays with dialyzed crude extracts prepared from 3,5-dimethoxybenzaldehyde-induced cells (grown in 1 mM 3,5-dimethoxybenzaldehyde for 4 days) of *Sphingobium* sp. strain JS1018.

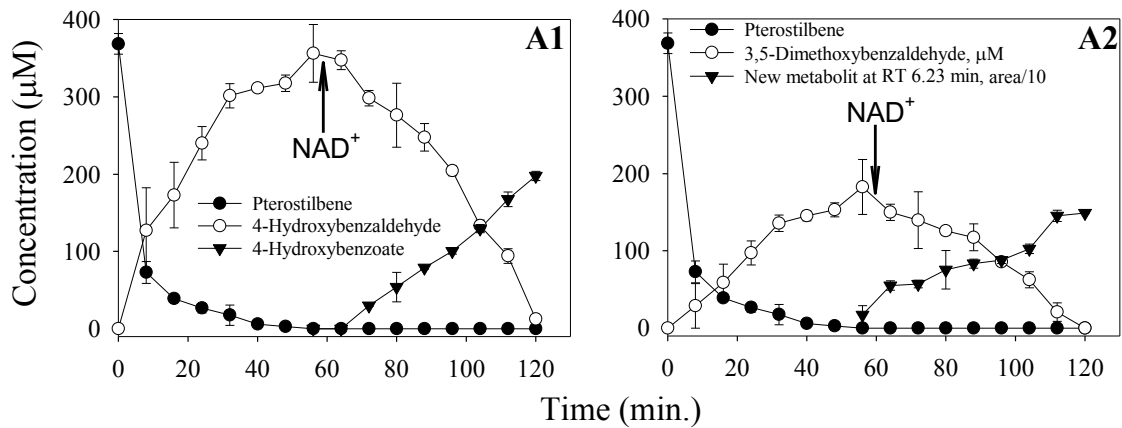

**Figure S3.** Degradation of pterostilbene (A1 and A2) in dialyzed crude extract of resveratrol-grown JS1018 cells. NAD<sup>+</sup> (3 mM) was added at 60 min in the enzyme assay.

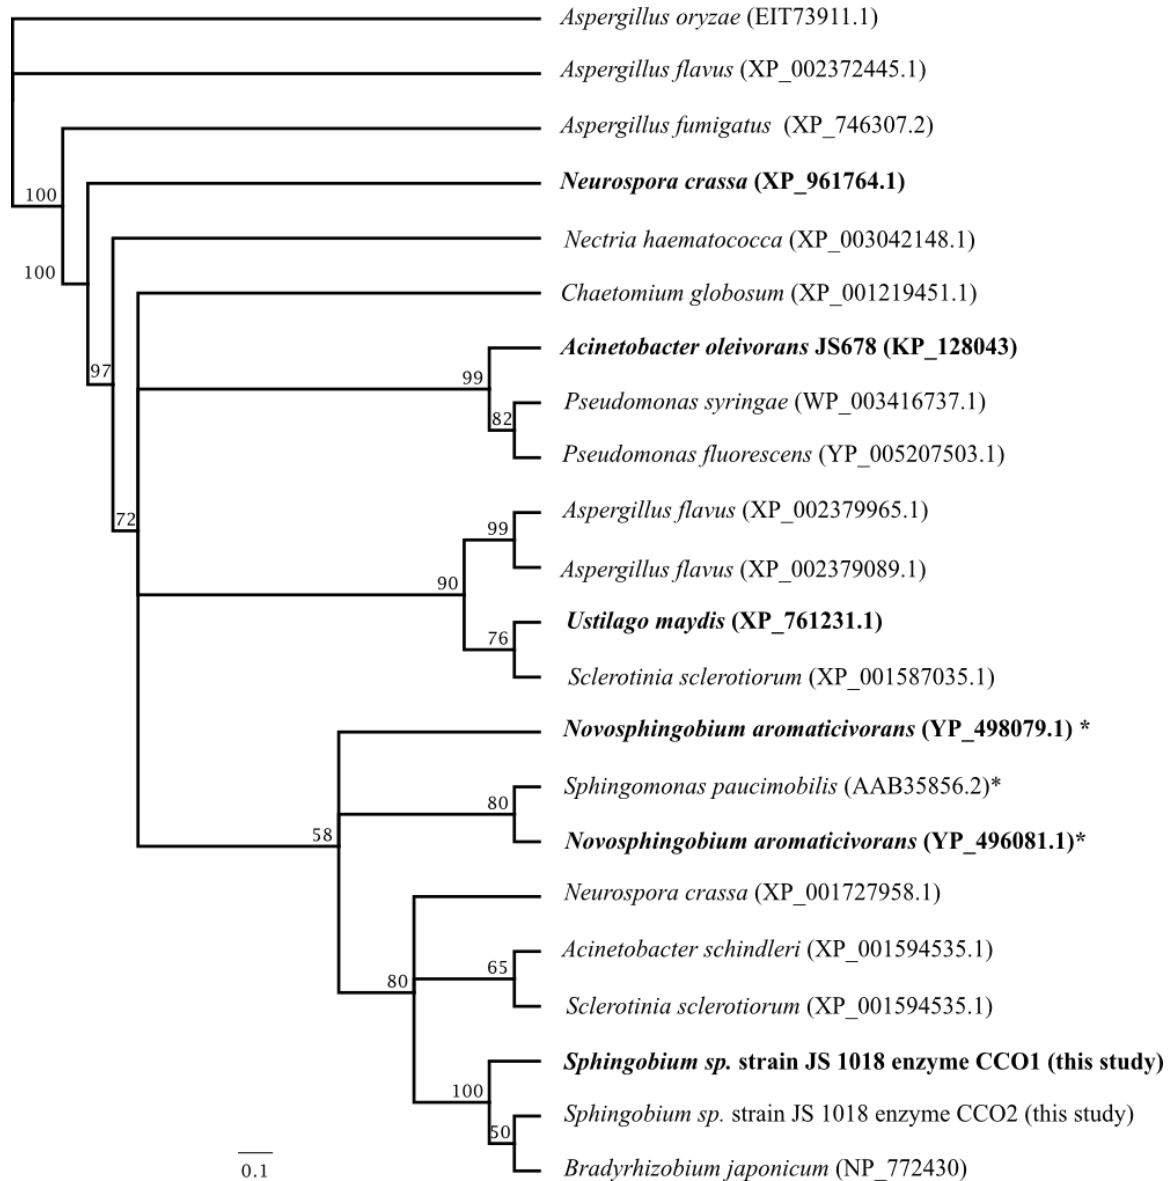

**Figure S4.** Phylogenetic analysis of functionally characterized carotenoid cleaving oxygenases (1-5). Enzymes that transform a stilbenoid are in bold and enzymes that were originally identified as lignostilbene oxygenases are marked with \*. The tree was constructed based on neighbor joining method and bootstrap values are included in nodes.

*Sphingomonas paucimobilis* .....  
*Spingobium sp. JS 1018* .....M  
*Acinetobacter sp. JS678* .....M  
*Arabidopsis thaliana* .....  
*Synechocystis sp. PCC6803* .....M  
*Novosphingobium aromaticivorans* MASLIITTKAMSHHHVLSSTRITTLYSDNSIGDQIQIKTKPQVPHRLPARRIFGVTRAVIN

*Sphingomonas paucimobilis* MAHFPQTTPGFSGLTRP - - - - - LRIEGDILDIEIEGVEVPPQLNGTFHRVHPDAQFPF  
*Spingobium sp. JS 1018* TSCFPDDPIYRGFDAP - - - - - GRVEANVFDLEVEGRVPELDGTFFRVAPDPQWPP  
*Acinetobacter sp. JS678* SFTFPNTSEFTGLYEP - - - - - CRIEADITDLVIEGDIIPSAIKGTFYQVAPDPQYYP  
*Arabidopsis thaliana* MGAFPQTIYFTGANAP - - - - - VGEEPDRLGLKVEGDLPAEVRGFSFYRAIPDPAPFP  
*Synechocystis sp. PCC6803* VTSPTSSPSQRSYSPQDWLRGYQSQQPEWDYVWEDVEGSIPPDLQGTLYRNGPGLLEIG  
*Novosphingobium aromaticivorans* SAAPSPLPEKEKVEGERRCHVAWTSVQQENWEGELTVQGKIPTWLNGLTYLRNGPGLWNIG  
 . . . . . \* . . . . . : \* : \* : \* : \* : \*

*Sphingomonas paucimobilis* RFEDDQFFNGDMVSLFRPH - DGKIDFRQRYAQTDKWKVERKAG - - - - - KSLFGAYRNPLT  
*Spingobium sp. JS 1018* MLGHDIFPFGDGMVCAFPRFK - DGRVDPTRSYAQTDKFAERQAR - - - - - KALYGAYRNPYT  
*Acinetobacter sp. JS678* MLGNDIFPFGDGVVTAIELG - EGRVSMKRRYVQTPRLVAQKQAH - - - - - RSLNGVYRNIIYT  
*Arabidopsis thaliana* RFENDHTLSGDGMVSRLSFNGDGTADFIQKYVETARYKAEKAAG - - - - - KALFGKYRNPFT  
*Synechocystis sp. PCC6803* DRPLKHPFDGDMVTAFAKFPDGRVHFSQKVFVTSQGYVEEQKAGKMIYRGVFGSQPAGGW  
*Novosphingobium aromaticivorans* DHDFRHLFDGYSTLVKLPD - GGRIFAHRFLSDAYKAAKHNRLCYRFSETPKSVII  
 . . . . . : \* : \* : \* : \* : \* : \*

*Sphingomonas paucimobilis* DDAVQGMIRGT - - - - - ANTNNVMVHAG - - - - - KLYAMKEDSPCLIMDPLTLETEGYT  
*Spingobium sp. JS 1018* DDPVAVGSIRST - - - - - ANTNNIVHHG - - - - - LLLALKEDSPVAMRPDTLETIGNY  
*Acinetobacter sp. JS678* NDP - LAAKNNTT - - - - - ANTTVIEHNG - - - - - VLLAMKEDALPWALDLKTLLETIGEW  
*Arabidopsis thaliana* DDPVQGVDRITV - - - - - ANTTVPVHAG - - - - - RMLMAKEDGRPVDRPRLATIGSY  
*Synechocystis sp. PCC6803* LKTI FDLRLKNI - - - - - ANTNITYWGD - - - - - RLLALWEGQPRLRLEPSNLATIGLD  
*Novosphingobium aromaticivorans* KNKPSFGIEIVRLFSGESLTDNANTGVILKGDGRVMCLTETQKGSILVDHETLETIGKF  
 . . . . . \* \* \* . . . . . : . . . . . : \* \* \*

*Sphingomonas paucimobilis* NFDGKLQS - QTFCAPHPKIDPVT - - - - - GNLCAFAYGAKGLMTLDMAYIEISPTGKLLKEIP  
*Spingobium sp. JS 1018* RFGDKMMS - EFTTAHPKVDPS - - - - - GELIAFGYSAGKVAATSDLAYVYIDRHGEVVEAW  
*Acinetobacter sp. JS678* DFNQINS - ATFTAHPKIEPKT - - - - - GNLLCFAYEAKGDGTPDIAYYIEISATGELLKEIW  
*Arabidopsis thaliana* DFGGALKS - ETMTAHPVRIIDAGT - - - - - GELFFYGYEADGQASTKVAYCIVGPDGELKRQW  
*Synechocystis sp. PCC6803* DLGGILAEQPLSAHPRIDPASTFDGGQPCYVTFISKSLSTLLELDPQKLLRQKT  
*Novosphingobium aromaticivorans* EYDDVLSDHMIQSAHPPIVTE - - - - - MWTLPDLVVKPYRVRMEAGSNKREVVRVRCR  
 . . . . . \* \* . . . . . : . . . . . :

*Sphingomonas paucimobilis* FQNPYYCMHDFGVTEHYAVFAVMPLLSS - - - - - WDRLEQRLPFPFDDTTLPCYLGLPRN  
*Spingobium sp. JS 1018* FTAPRAASIHDFAVTENYVVPVGSHEIE - - - - - TERLKAGKPAFVWRPDEVIYGLVPRR  
*Acinetobacter sp. JS678* FQAPYAAIHDFAVTENYVIFPIIPLTVD - - - - - IERMKKGQHPQWQDLEQLFGLIPRS  
*Arabidopsis thaliana* FDAPYCAMHDFTISENYALFPIYPTAD - - - - - LDRLKAGGEHWHQPELDSWLVMPRY  
*Synechocystis sp. PCC6803* ETPFGFAIHDFAITPHYALFLQMNVTNLGLFYLFLGRGAGECVQFHDPKPAQIILVPRD  
*Novosphingobium aromaticivorans* SSGSWGPGWHSFAVTENYVVIEMPLRYSVKNLLRAEPTLYKFEWCPQDGAFIHMVMSKL  
 . . . . . \* \* . . . . . : \* : \* : \* : \* : \*

*Sphingomonas paucimobilis* GDARDLRWFKTGN - CFVGHVMAFNADGT - - - - - KVHIDMPVSRNNSFPFF -  
*Spingobium sp. JS 1018* GNAEDMRWFTVPTNGFQGHITINAWDDGH - - - - - KVYVDMPLNDNAFWFYP  
*Acinetobacter sp. JS678* QQAEDIQWFGPKNGFQCHTLNSFEKNG - - - - - KIYVDMPVASGNVYFYP  
*Arabidopsis thaliana* GDVSEIKWFKGPKGCHSYHMMNAWEDADG - - - - - MLHFDACLNNTNAPAFIR  
*Synechocystis sp. PCC6803* G - - - - - GEIKRIPVQAGFVPHANAFEENG - - - - - KILDSICYNSLPQVDTD  
*Novosphingobium aromaticivorans* TG - - - - - EVVASVEVPAYVTFHFINAYEEDKNGDGKATV IADCEHNADTRLDMRLDLRL  
 . . . . . \* \* : \* : . . . . . \*

*Sphingomonas paucimobilis* DVHGAFFDFVAGQGLTRWTVDMASNGDSFEKTERLDFRDPFPFRIDERYATRAYERHGW  
*Spingobium sp. JS 1018* DENGHAHPSTLQTMTRWIFDLSNS - VTPQMDIIPAPMGEPHIDERYATRYRHAFL  
*Acinetobacter sp. JS678* PAEAPVHSEQITSAIMRWEFDLQATDHHVVKPPIITNKQYPCFPFRCDERFNGLEYSYGFL  
*Arabidopsis thaliana* EPSGIHMQPDIKGLTRWTVDPADG - - - - - GDVVETVIGPPCFPVIPAKLQGRPYKTGWM  
*Synechocystis sp. PCC6803* GDFRSTNFDNLDPGLNRFTIDFAAAT - - - - - VEKQLMVRCCFPVVFHQVGRPYRYVYM  
*Novosphingobium aromaticivorans* SSHGHVLPDARIGRFRIPLDGSKYGLKLETAVEAEKHGRAMMCSINPLYLGQKYRYVYA  
 . . . . . : . . . . . : \* : \* : \*

*Sphingomonas paucimobilis* LILDTEKPYEAPGG - - - - - AFYALTNTLGHIDLATGKSSSWAGPRCAIQEPCFIPRSPD  
*Spingobium sp. JS 1018* AVIDPTAPYDFQRCGPP - - - - - SVNAFLNGLAHVDMTASRRWLPGPTSTVQEPVFAFRSPE  
*Acinetobacter sp. JS678* LAFDPLAFDHEHNLG - E - - - - - YPFQFNQLARVMVQTGITETWYFGDKYCFCEPIFIFRSND  
*Arabidopsis thaliana* LSMNPELQGPLFAGPVGVSNLLRLRDGMTPAPQVTGALALPMPAGFNEPVHVP - - AA  
*Synechocystis sp. PCC6803* GAAHSTG - - - - - NAPLQAILKVDLESGETLRSFAPHGFAGEPIFVFRPFGG  
*Novosphingobium aromaticivorans* CGAQRPCN - - - - - FPNALSVDIVEKKVKNWHEHG - MIPSEPFVFRPGA  
 . . . . . \* \* . . . . . : \* \* . . . . . \*

*Sphingomonas paucimobilis* APEGDGYVIALVDDHVANY - - - - - SDLAIFDAQHVQGP IARAKLPVRI RQGLHGNWADASR  
*Spingobium sp. JS 1018* SPEGDGYVIALVNRLDEM - - - - - SDLVVLDQAQHIDEGPVATIRLPRLRNLGHNWVPSSA  
*Acinetobacter sp. JS678* ASEGDGWVASIMNDLLEEK - - - - - SELVILDQTNWEKGP IARVKIPFRLRMSLHGNWSPQEK  
*Arabidopsis thaliana* DPAKDGLVFLVDQVQVGDGQVHEAWVVDAGNIGAGAVAKVHIPTRLRQVHGNWVPQAO  
*Synechocystis sp. PCC6803* VAEDDGWLLCLLYKADLHR - - - - - SELVILDQAQDITAPAIATLKLKHHPYPLHGSWAQT - -  
*Novosphingobium aromaticivorans* THEDDGVVISIVSEENGSS - - - - - FAILLDGSSFEIARAKFPYGLPYLHGCWIPKD -  
 \* \* : \* : . . . . . : \* : \* : \* : \*

*Sphingomonas paucimobilis* LAVAA - - - -  
*Spingobium sp. JS 1018* MRSPLPA - - - -  
*Acinetobacter sp. JS678* - - - - -  
*Arabidopsis thaliana* LDALEGSAA  
*Synechocystis sp. PCC6803* - - - - -  
*Novosphingobium aromaticivorans* - - - - -

**Figure S5.** Conserved histidines (red rectangles) and glutamic acids (blue rectangles) of CCO1 and previously characterized carotenoid oxygenases using T-coffee server. The accession numbers of the sequences from top to the bottom used are Q53353, KY888940, Q8VY26, P74334\*, KX523172 and Q2G4H8\*. \*enzymes with established crystal structures.

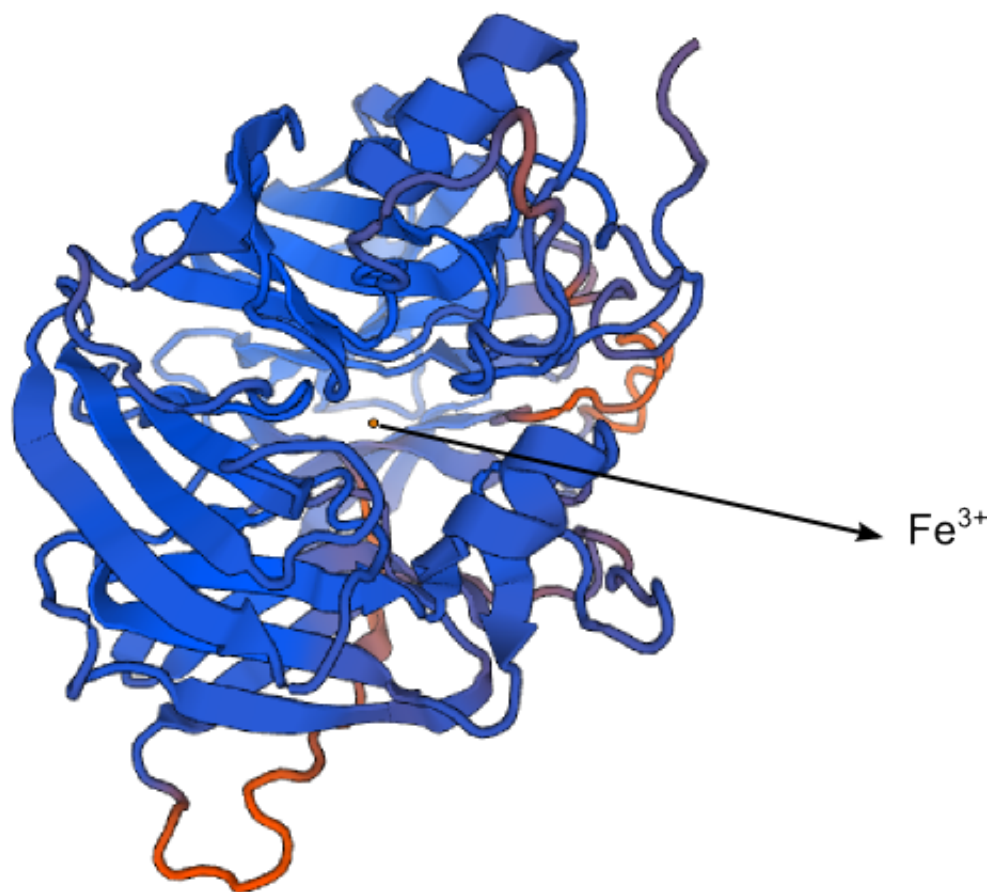

**Figure S6.** Model using SWISS-MODEL (6-8).



**Table S1 Stilbenoid degrading bacteria isolated from peanut plants in Dawson, GA.**

| Isolates                | Most closely related sequence<br>(Accession number)          | Max Identifica-<br>-tion<br>(%) | Grow on<br>Res/Ptero<br>(Base pairs) | Potential<br>PGPB<br>species**<br>(see ref.) |
|-------------------------|--------------------------------------------------------------|---------------------------------|--------------------------------------|----------------------------------------------|
| <b>Rhizosphere soil</b> |                                                              |                                 |                                      |                                              |
| JS678                   | <i>Acinetobacter calcoaceticus</i> B9 (JQ579640)             | 99.9                            | Res/Ptero (1411)                     | H(9, 10)                                     |
| JS679                   | <i>Pseudomonas fluorescens</i> NBRC 13922 (AB680523)         | 99.7                            | Res/Ptero (1409)                     | H/N(11)                                      |
| JS680                   | <i>Pseudomonas fluorescens</i> strain IBFC2012-45 (KC246049) | 99.9                            | Res (1408)                           | H/N(11)                                      |
| JS681                   | <i>Pseudomonas</i> sp. MGR37 (JQ627866)                      | 99.8                            | Res (1393)                           | -                                            |
| JS682                   | <i>Pseudomonas</i> sp. d6(2010) (HQ166101)                   | 99.8                            | Res/Ptero (1410)                     | N                                            |
| JS683                   | <i>Burkholderia cenocepacia</i> SR2-07 (KF891406)            | 99.8                            | Res/Ptero (1402)                     | H/N(12)                                      |
| JS1012 Soil 1 D2        | <i>Pseudomonas oryzihabitans</i> (JX067903)                  | 99.8                            | Res (1407)                           | H(13)                                        |
| JS1013 Soil 2 C3        | <i>Agrobacterium tumefaciens</i> (KC107786)                  | 100                             | Res/Ptero (1352)                     | H/N(14)                                      |
| JS1014 Soil 3 F5        | <i>Pseudomonas putida</i> strain SP2 (GQ200822)              | 100                             | Res/Ptero (1402)                     | H/N(15)                                      |
| JS1015 Soil 4 B9        | <i>Pseudomonas frederiksbergensis</i> strain M60 (KC934887)  | 99.8                            | Res/Ptero (1394)                     | -                                            |
| JS1016 Soil 5 2ndC3     | <i>Pseudomonas putida</i> strain P-1017-1 (HQ324912)         | 99.6                            | Res/Ptero (1392)                     | H/N(15)                                      |
| JS1017 Soil 6 A1Ptero   | <i>Pseudomonas putida</i> strain NB2011 (JF261631)           | 99.4                            | Res/Ptero (1401)                     | H/N(15)                                      |
| JS1018 Soil 7 C2Ptero   | <i>Sphingobium yanoikuyae</i> strain BF-18 (EU307932)        | 100                             | Res/Ptero (1361)                     | -                                            |
| JS1019 Soil 8 D2Ptero   | <i>Sphingobium yanoikuyae</i> strain St16 (JN700070)         | 99.5                            | Res/Ptero (1360)                     | -                                            |
| JS1020 Soil 9 F3Ptero   | <i>Sinorhizobium morelense</i> strain LMG 9954 (AM181735)    | 99.9                            | Res/Ptero (1359)                     | N(16)                                        |
| JS1021 Soil 10 H3Ptero  | <i>Pseudorhodoferax aquiterrae</i> NAFc-7 (NR 108842)        | 99.0                            | Res/Pteto (1406)                     | -                                            |
| JS1022 Soil 11 B4Ptero  | <i>Pseudomonas</i> sp. SJH-007 (KC335141)                    | 100                             | Res/Ptero (1410)                     | -                                            |
| <b>Peanut seeds</b>     |                                                              |                                 |                                      |                                              |
| JS1023 Seed 12 A1       | <i>Xanthomonas translucens</i> strain P25 (AY994101)         | 99.7                            | Res (1419)                           | N(17)                                        |
| JS1024 Seed 13 E3       | <i>Xanthomonas translucens</i> strain P7 (AY994100)          | 99.6                            | Res (1417)                           | N(17)                                        |
| JS1025 Seed 14 F3       | <i>Xanthomonas</i> sp. Sbr1009a (KC311265)                   | 99.8                            | Res/Ptero (1405)                     | N(17)                                        |

|                            |                                                                 |      |                     |         |
|----------------------------|-----------------------------------------------------------------|------|---------------------|---------|
| JS1026 Seed<br>15_A1       | <i>Pandoraea</i> sp. JB1 (DQ167022)                             | 99.8 | Res/Ptero<br>(1399) | N(18)   |
| JS1027 Seed<br>16_B2       | <i>Pandoraea</i> sp. CCUG 39680<br>(AY268171)                   | 99.5 | Res/Ptero<br>(1407) | N(18)   |
| JS1028 Seed<br>17_C1       | <i>Pandoraea</i> sp. B-6<br>(JN128829)                          | 99.5 | Res/Ptero<br>(1400) | N(18)   |
| JS1029 Seed<br>19_B2Ptero  | <i>Xanthomonas</i> sp. Era34<br>(JQ977166)                      | 99.8 | Res/Ptero<br>(1401) | N(17)   |
| JS1030 Seed<br>20_D2Ptero  | <i>Xanthomonas translucens</i> NBRC 13559<br>(AB680445)         | 99.8 | Res/Ptero<br>(1418) | N(17)   |
| <b>Peanut shells</b>       |                                                                 |      |                     |         |
| JS1031 Shell<br>21_D1      | Uncultured <i>Herbaspirillum</i> sp. clone<br>A4H6M9 (GQ206314) | 99.8 | Res/Ptero<br>(1401) | -       |
| JS1032<br>Shell 22_E1      | <i>Pandoraea</i> sp. LY<br>(AF532595)                           | 99.8 | Res/Ptero<br>(1406) | N(18)   |
| JS1033 Shell<br>23_F1      | <i>Burkholderia</i> sp. A45<br>(KF788025)                       | 99.5 | Res/Ptero<br>(1401) | N(12)   |
| JS1034 Shell<br>24_H1      | <i>Pandoraea</i> sp. AU1775<br>(AY043377)                       | 99.9 | Res/Ptero<br>(1401) | N(18)   |
| JS1035 Shell<br>25_C4      | <i>Burkholderia</i> sp. IBP-VNS150<br>(JQ518349)                | 99.6 | Res/Ptero<br>(1398) | H/N(12) |
| JS1045 Shell<br>26_F4Ptero | <i>Pectobacterium cypripedii</i> strain B1<br>(JF430157)        | 99.0 | Res/Ptero<br>(1409) | N(19)   |

\* Strains were isolated from resveratrol enrichments except for the ones with “ptero” in the designation, which were enriched with pterostilbene”.

\*\* PGPB represents Plant Growth-Promoting Bacteria (including rhizobia) that could enhance plant growth through producing plant hormones (‘H’) and/or improving plant nutrition (‘N’).

**Table S2 DNA sequences of two putative carotenoid cleavage oxygenase (*cco*) genes identified from the genome of *Sphingobium yanoikuyae* strain JS1018.**

**>*cco1*-JS1018 (KX523172)**

atgacatcgtgctttcctgacgatccgatctatcgccgattgatgcaccaggtcgagt  
gaggcgaatgtttcgcgatcgcaggtcgaaggccgggtcctccggagcttgatggaaca  
ttcttcgcgctcgtcctgacccccaatggccaccgatgctggggcatgacattttctc  
aacggcgatgggatggtttgtcctccgcttcaaggacggacgtgctgattttacgtcc  
agatatgcacagacggacaagttgtggcggaaacggcaggcacgcaaggcgtgtacggc  
gcatatcgcaatccatacacgggatgacccgagcgtggccggctctattcgcagtaccgcc  
aataccaacgtaatcgttcatcatgattgctgctggccctcaaggaagacagccgcct  
gtggccatgcggcccgcgatacctcgagacaatcggaaactatcgattcggcgacaagatg  
atgagtgagactttcacggcgcacccgaaggcgcgatccggcagtgggcgaattgatcgca  
ttcggatagcgcaaaaggcgcgcgaaccagcgcgatctcgcctattacgtaatcgaccgc  
catggggaagtgttacacgaggtggttaccgcgcctcgcgccgttcaattcatgat  
ttcgcggtgaccgaaaattatgtggtatttctgtcggctcgcgatgagattgagactgag  
cgattgaaggctgggaagccggcctttgtgtggcgaccgacgtcgaacaaattatggt  
gtgctcccgcggcggtaatgcggaggatagcgcctggtttacggtcccaccaacggg  
ttcaaggacacacgatcaatgcctgggatgacgggcataaggtttatgtcgatatgcc  
atgctcaacgacaacgcattttggttctatccggatgaaaatggtcacgcgectcatcca  
agcacattgaagcagacaatgacgcgatggatcttcgatctgtccagcaacagcgtcacg  
ccgcaaatggacatcattccggcaccgatgggcgaatttctcatattgacgagcgtac  
gcgacaaggccctatcgacacgctttctggcagttatcgatccgacagcgcctatgat  
ttccagcgggtgcggaccgccgtccgtgaatgcatttctgaacggccttgacatgtcgac  
atgacgacaggtgcaagccgctgtggctcccggaccgacctccacagtcaggagcct  
gtcttcgctccacgctcaccgaatcggcgaaggatggctacgtgattgcgcttgc  
aaccggcttgatgaaatgcgtagcgcacctggttcttctgatgccagcatatcgacgaa  
ggtccggtcgcgaccatccgtcctccggtgcgactcgcgaatggactgcatggaattgg  
gttcttcaagtgccatgaggtcgccattccggcttga

**>*cco2*-JS1018 (KX523173)**

atggcaactcgttacggcaccgggtgattgatcatgcgcccgctggcggaccgataat  
ccgcacctaaccggagcatgggcgcatggacggaagaacgtcagccttcgatgtacc  
gtcgaaggcaccattcctgaagatctgtcggcggcctttccggatttcagcaaatccc  
cgctttgagcctatcgatctggaaacctaccattggttcgatggagacggcatggtgggt  
gggatttacatcgtgacggcaaggctacgtaccgtcaaaaatgggtggagactgcgctc  
atggccgtggaattggcggcgcggcaggcctgtatcctggcctagtgaatggctcgaaa  
ggccggcctttgccggctggcgcgccgcatgaagaacgtgccaacattaccggcgggt  
cttttggccggcgttcttctgactactcgaaggcgggttggcaacggagatgcatccg  
ctgactctcgccacgcgcggttagcttcgatttcatggtcgcgtcaatcagacctgtgcg  
gcccactataaaatcgatccagtaagtggcgacatgcttgttccggtgcgctcggatcg  
cagatcacttaccagccaacgcaagcacggccgaaatcgtcgatatgcatatcttc  
gacatcggcttggcctgatgatgcatgattttcgggcactgaaaattacgccatttct  
ttgtcacggctgttcaaatccgcgctcgatctggccatgcaaggaaaaccagcgtggt

tgggatgaatccggcttgcccaacggaacgaggatcgttctgatgaaccggcatacgc  
gatttgacttggcatgacgtcggcgaattcgtaacacgcacaattacaatgcctac  
gaattggacgggaaagtcttcatccatggccattctctgatcgcacggggacgccgatc  
gaacatctcgataagccagtcacgtcgaaggaatggatggaatcaccgccctccctgccg  
catcgtcggaccatcgattgtcgcacagggcgcgtccatgaggaaagacttagcgatctt  
gctggcgatttccaaaatcaacgatgccttgacgacacggcatcatcgttcggctat  
tgacggcaaccaccaagtctggctcgaagcaatgacctcgggctggtaaagcatgac  
ctcgagcgaggcagcatcgtatcgcagagtcgggacgccagccttaccagccaacg  
gaagtcgtcttctgtcccggcgtggcgcagtcgaagaggatgacggttatctctgtcg  
ctgtggtggaaccgcgaaacgcgattgagcgaattgctgtgcacagcgcgaaggaacca  
agcccaatccgctggcgcgagtcgccttcccggccttcttacggccccacggg  
aactgggctgatgccgaaagtctggatcaggcggccgctgcttatgcgacgggaaattga

### **Materials and Methods – Extra LCMS Methods for Sample Analysis**

A few of selected samples were also analyzed by a mass spectrometry Thermo Orbitrap XLT (Thermo Sci.). The column was a Supelco Ascentis Express C8, 300  $\mu\text{m}$   $\times$  15cm, using 2.7  $\mu\text{m}$  particles. The LC system was a Nano ACQUITY UPLC System (Waters Corp.). Solvent A was 5% acetonitrile in water, and solvent B was 95% acetonitrile in water. Both solvents contained 0.1% (v/v) formic acid. The flow rate was 5  $\mu\text{L min}^{-1}$ . The gradient began at 100% A and was held for 5 min, then ramped to 100% B at 45 min. It was held there until 55 min and then reset to 100% A until the end of the run at 60 mins. The Orbitrap was scanned in positive ESI mode from 200-2000 Da, at a mass resolution of 30000.

## REFERENCES

1. Brefort T, Scherzinger D, Limon MC, Estrada AF, Trautmann D, Mengel C, Avalos J, Al-Babili S. 2011. Cleavage of resveratrol in fungi: characterization of the enzyme Rco1 from *Ustilago maydis*. *Fungal Genet Biol* 48:132-143.
2. Kamoda S, Saburi Y. 1993. Cloning, expression, and sequence analysis of a lignostilbene- $\alpha,\beta$ -dioxygenase gene from *Pseudomonas paucimobilis* TMY1009. *Biosci Biotechnol Biochem* 57:926-930.
3. Kamoda S, Saburi Y. 1993. Structural and enzymatical comparison of lignostilbene- $\alpha,\beta$ -dioxygenase isozymes, I, II, and III, from *Pseudomonas paucimobilis* TMY1009. *Biosci Biotechnol Biochem* 57:931-934.
4. Marasco EK, Schmidt-Dannert C. 2008. Identification of bacterial carotenoid cleavage dioxygenase homologues that cleave the interphenyl  $\alpha,\beta$  double bond of stilbene derivatives via a monooxygenase reaction. *Chembiochem* 9:1450-1461.
5. Masai E, Katayama Y, Nishikawa S, Fukuda M. 1999. Characterization of *Sphingomonas paucimobilis* SYK-6 genes involved in degradation of lignin-related compounds. *J Ind Microbiol Biotechnol* 23:364-373.
6. Biasini M, Bienert S, Waterhouse A, Arnold K, Studer G, Schmidt T, Kiefer F, Gallo Cassarino T, Bertoni M, Bordoli L, Schwede T. 2014. SWISS-MODEL: modelling protein tertiary and quaternary structure using evolutionary information. *Nucleic Acids Res* 42:W252-258.
7. Arnold K, Bordoli L, Kopp J, Schwede T. 2006. The SWISS-MODEL workspace: a web-based environment for protein structure homology modelling. *Bioinformatics* 22:195-201.
8. Benkert P, Biasini M, Schwede T. 2011. Toward the estimation of the absolute quality of individual protein structure models. *Bioinformatics* 27:343-350.
9. Kang SM, Joo GJ, Hamayun M, Na CI, Shin DH, Kim HY, Hong JK, Lee IJ. 2009. Gibberellin production and phosphate solubilization by newly isolated strain of *Acinetobacter calcoaceticus* and its effect on plant growth. *Biotechnol Lett* 31:277-281.
10. Yamaga F, Washio K, Morikawa M. 2010. Sustainable biodegradation of phenol by *Acinetobacter calcoaceticus* P23 isolated from the rhizosphere of duckweed *Lemna aoukikusa*. *Environ Sci Technol* 44:6470-6474.
11. Kochar M, Upadhyay A, Srivastava S. 2011. Indole-3-acetic acid biosynthesis in the biocontrol strain *Pseudomonas fluorescens* Psd and plant growth regulation by hormone overexpression. *Res Microbiol* 162:426-435.
12. Onofre-Lemus J, Hernandez-Lucas I, Girard L, Caballero-Mellado J. 2009. ACC (1-aminocyclopropane-1-carboxylate) deaminase activity, a widespread trait in *Burkholderia* species, and its growth-promoting effect on tomato plants. *Appl Environ Microbiol* 75:6581-6590.
13. Belimov AA, Safronova VI, Sergeyeva TA, Egorova TN, Matveyeva VA, Tsyganov VE, Borisov AY, Tikhonovich IA, Kluge C, Preisfeld A, Dietz KJ, Stepanok VV. 2001. Characterization of plant growth promoting rhizobacteria isolated from polluted soils and containing 1-aminocyclopropane-1-carboxylate deaminase. *Can J Microbiol* 47:642-652.
14. Hao X, Xie P, Johnstone L, Miller SJ, Rensing C, Wei G. 2012. Genome sequence and mutational analysis of plant-growth-promoting bacterium *Agrobacterium tumefaciens* CCNWGS0286 isolated from a zinc-lead mine tailing. *Appl Environ Microbiol* 78:5384-5394.

15. Roca A, Pizarro-Tobias P, Udaondo Z, Fernandez M, Matilla MA, Molina-Henares MA, Molina L, Segura A, Duque E, Ramos JL. 2013. Analysis of the plant growth-promoting properties encoded by the genome of the rhizobacterium *Pseudomonas putida* BIRD-1. *Environ Microbiol* 15:780-794.
16. Larrainzar E, Gil-Quintana E, Seminario A, Arrese-Igor C, Gonzalez EM. 2014. Nodule carbohydrate catabolism is enhanced in the *Medicago truncatula* A17-*Sinorhizobium medicae* WSM419 symbiosis. *Front Microbiol* 5:447.
17. Lucy M, Reed E, Glick BR. 2004. Applications of free living plant growth-promoting rhizobacteria. *Antonie Van Leeuwenhoek* 86:1-25.
18. Anandham R, Gandhi PI, Madhaiyan M, Sa T. 2008. Potential plant growth promoting traits and bioacidulation of rock phosphate by thiosulfate oxidizing bacteria isolated from crop plants. *J Basic Microbiol* 48:439-447.
19. Adams AS, Currie CR, Cardoza Y, Klepzig KD, Raffa KF. 2009. Effects of symbiotic bacteria and tree chemistry on the growth and reproduction of bark beetle fungal symbionts. *Can J For Res* 39:1133-1147.
